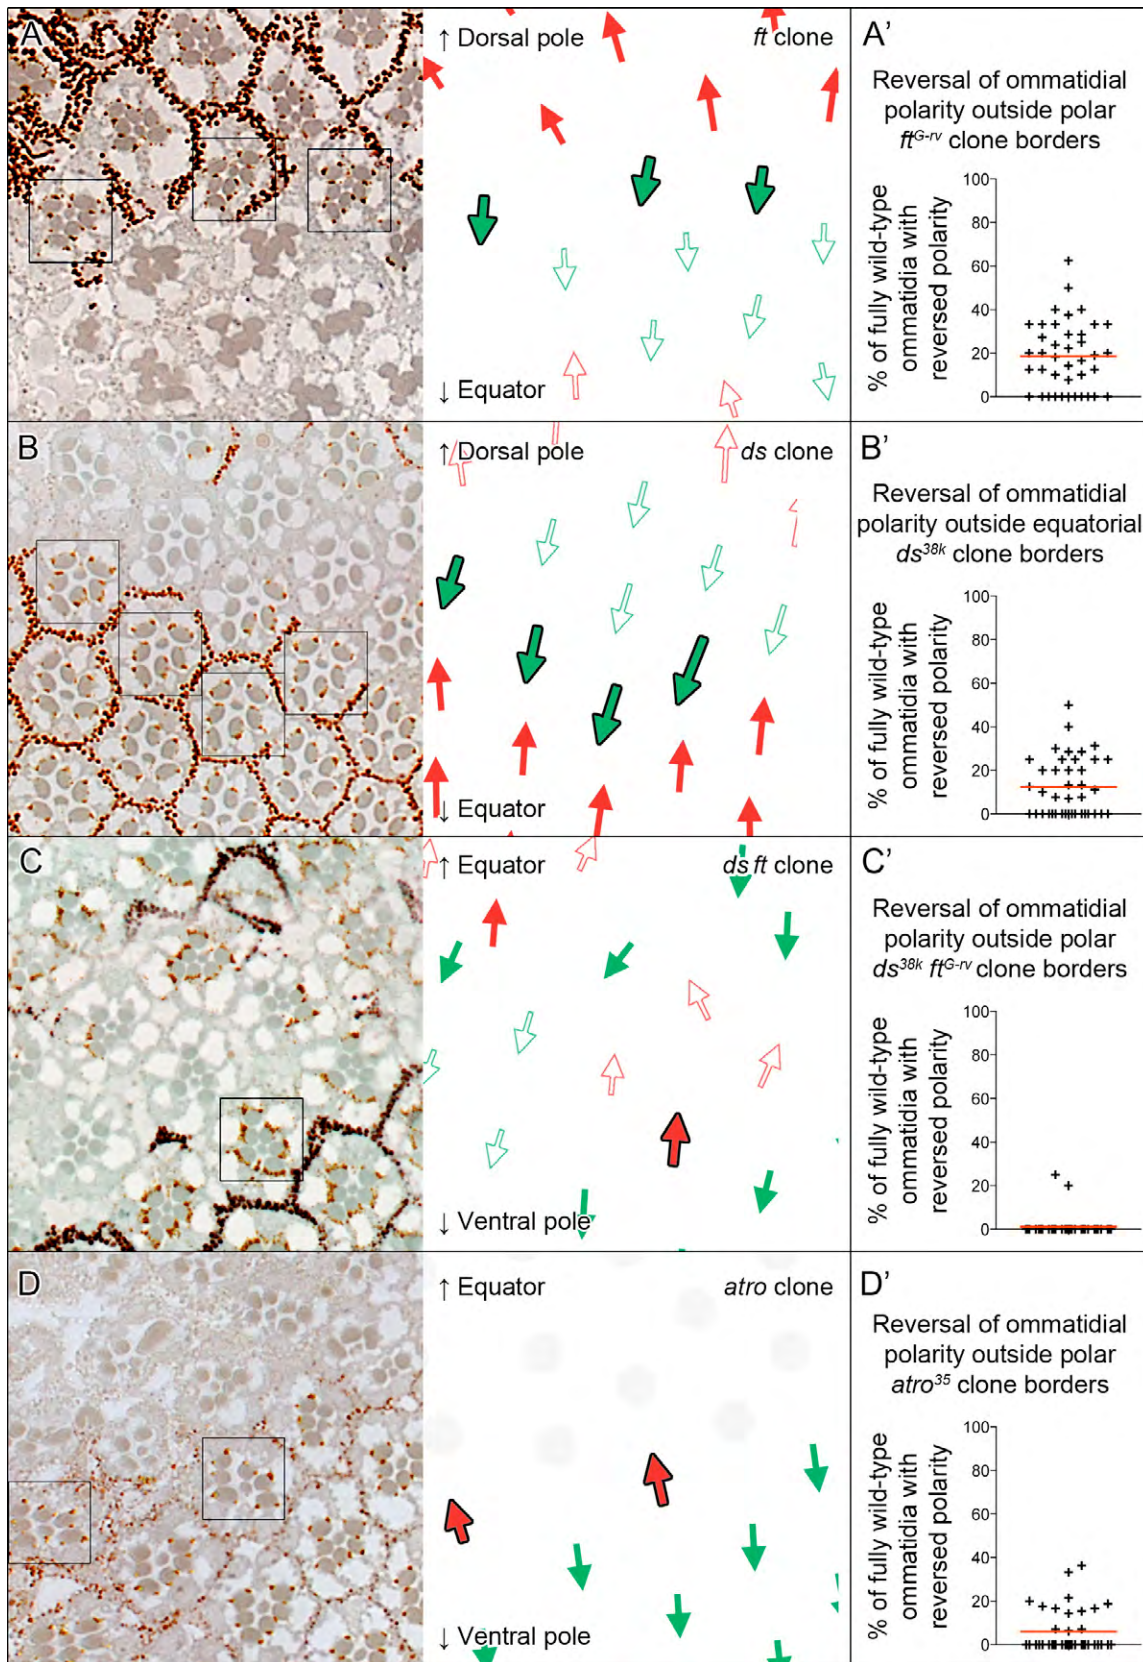

**Fig. S1. Polarity reversals occur in fully wild-type ommatidia on clone borders.** Polarity reversals in ommatidia with at least seven wild-type photoreceptors. In this figure, these fully wild-type ommatidia are enclosed in boxes in the sections, and are represented as solid arrows with a black outline to distinguish them from ommatidia that are R3<sup>+</sup>/R4<sup>+</sup> but mosaic for other photoreceptors, which do not have the black outline. (A,A') *ft* clones cause polarity reversals in 19% of fully wild-type ommatidia on the polar side ( $n=40$  clones/331 ommatidia). (B,B') *ds* clones cause polarity reversals in 12% of fully wild-type ommatidia on the equatorial side ( $n=40$  clones/355 ommatidia). (C,C') *ds ft* clones cause polarity reversals in 1% of fully wild-type ommatidia on the polar side ( $n=40$  clones/288 ommatidia). (D,D') *atro* clones cause polarity reversals in 6% of fully wild-type ommatidia on the polar side ( $n=38$  clones/362 ommatidia).

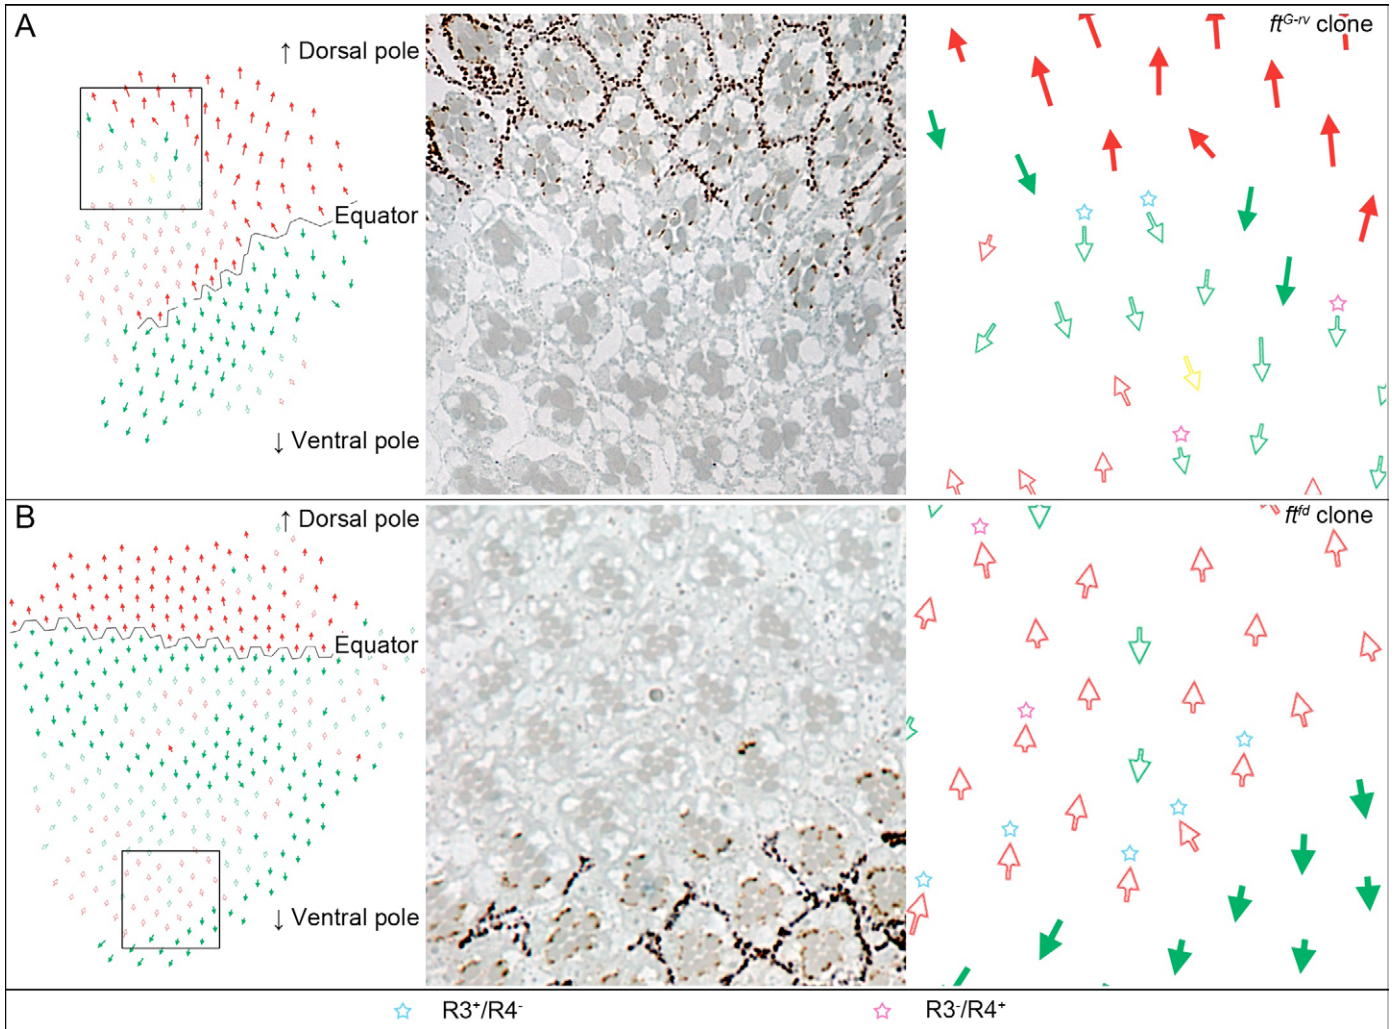

**Fig. S2. R3/R4 mosaic ommatidia behave like fully mutant ommatidia in responding to polarity signals.** R3/R4 mosaic ommatidia are represented with stars over hollow arrows (R3<sup>+</sup>/R4<sup>-</sup>: cyan stars, R3<sup>-</sup>/R4<sup>+</sup>: magenta stars). **(A)** Mosaic ommatidia on the polar border of a *ft<sup>G-rv</sup>* clone have reversed polarity, similarly to their fully mutant neighbors. **(B)** Mosaic ommatidia on the polar border of a *ft<sup>fd</sup>* clone have reversed polarity, similarly to their fully mutant neighbors.



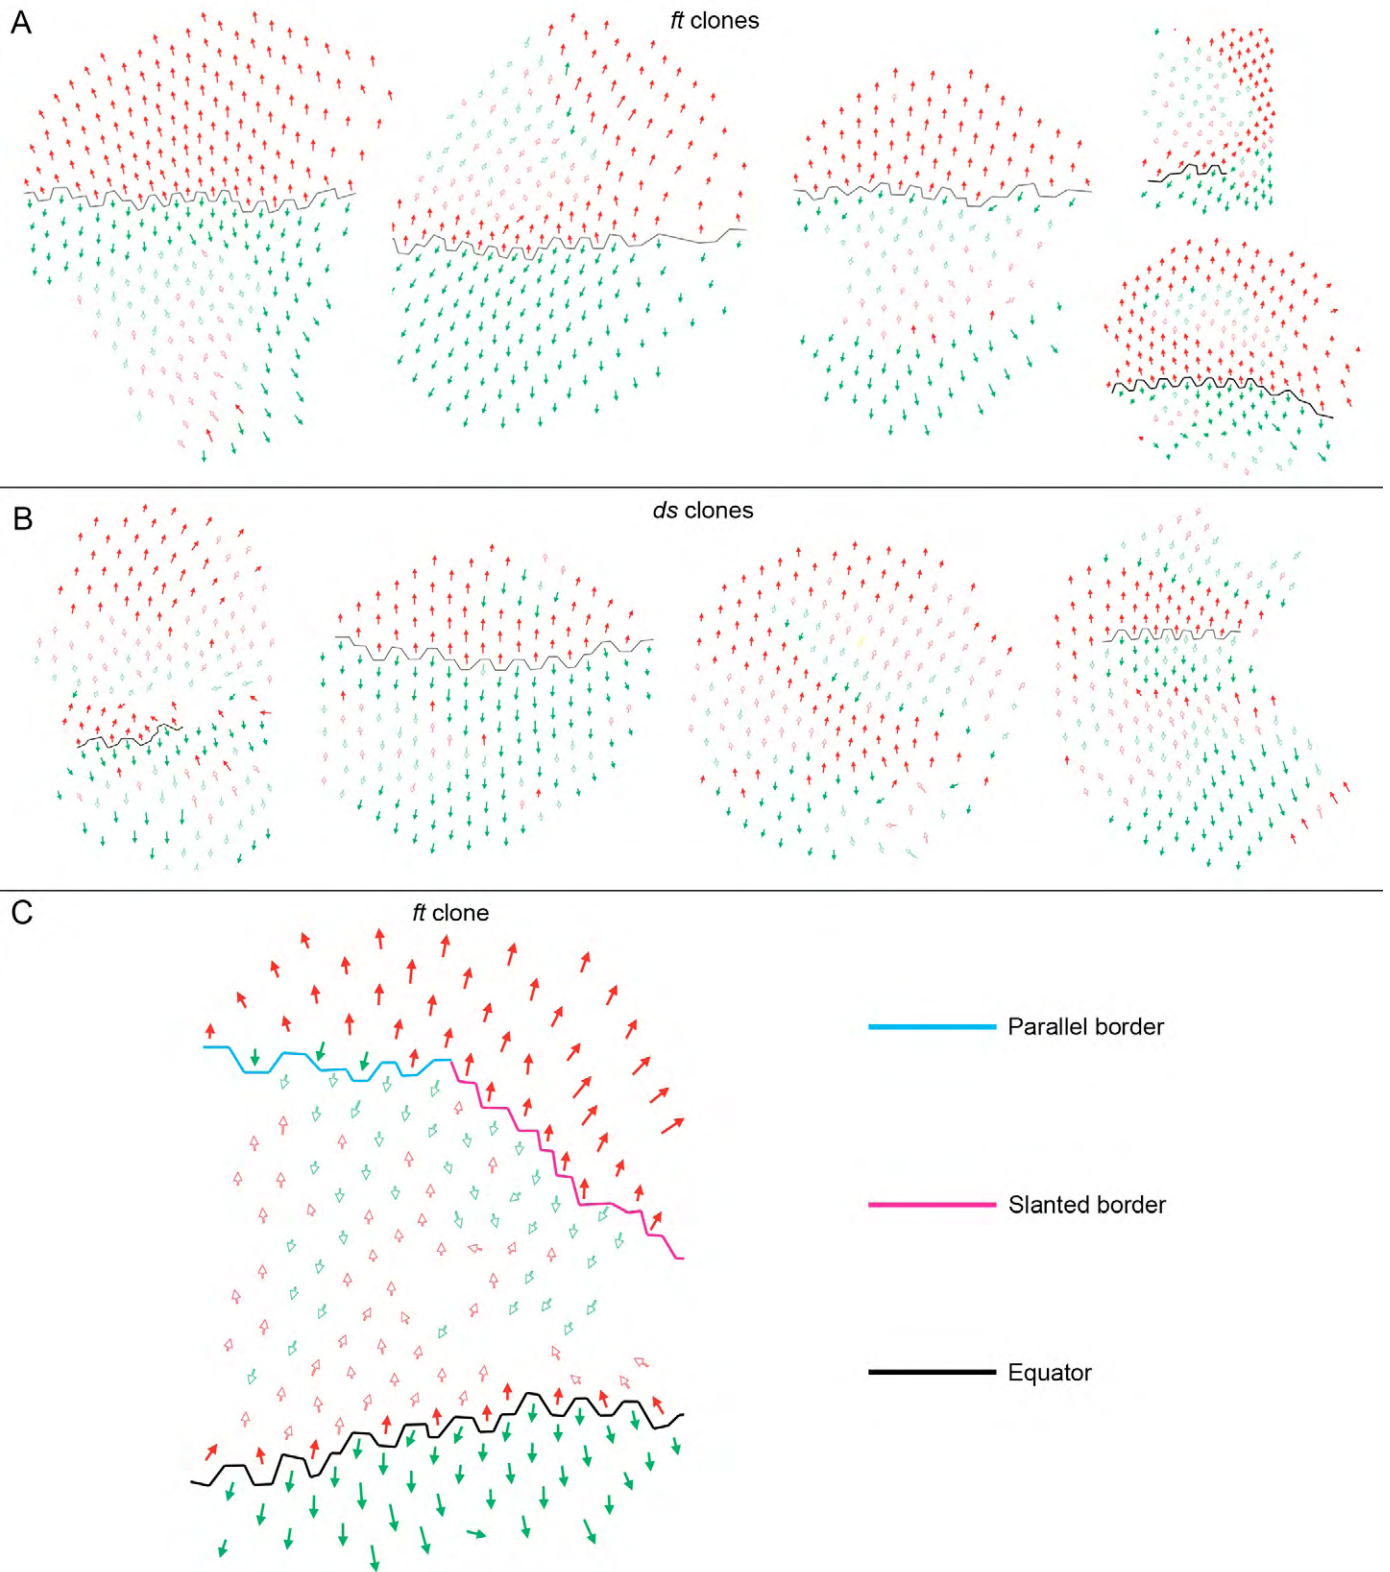

**Fig. S3. Polarity information is transmitted inside *ft* and *ds* clones.** (A) *ft* clones have polarity rescued on the equatorial side, and reversed on the polar side. These effects are strongest near the borders and extend up to several rows. In the middle of the clones these effects are weak or non-existent, and polarity is randomized. (B) *ds* clones have polarity rescued on the polar side, and reversed on the equatorial side. The reversal effect of *ds* clones is not as strong as that of *ft* clones, and rarely extends past one ommatidial row. However, the rescue effect is strong, and can extend for multiple rows. (C) Example of a *ft* clone indicating clone borders parallel (cyan line) and slanted (magenta line) relative to the equator. This clone shows the general trend of parallel borders to have more reversals than slanted borders.





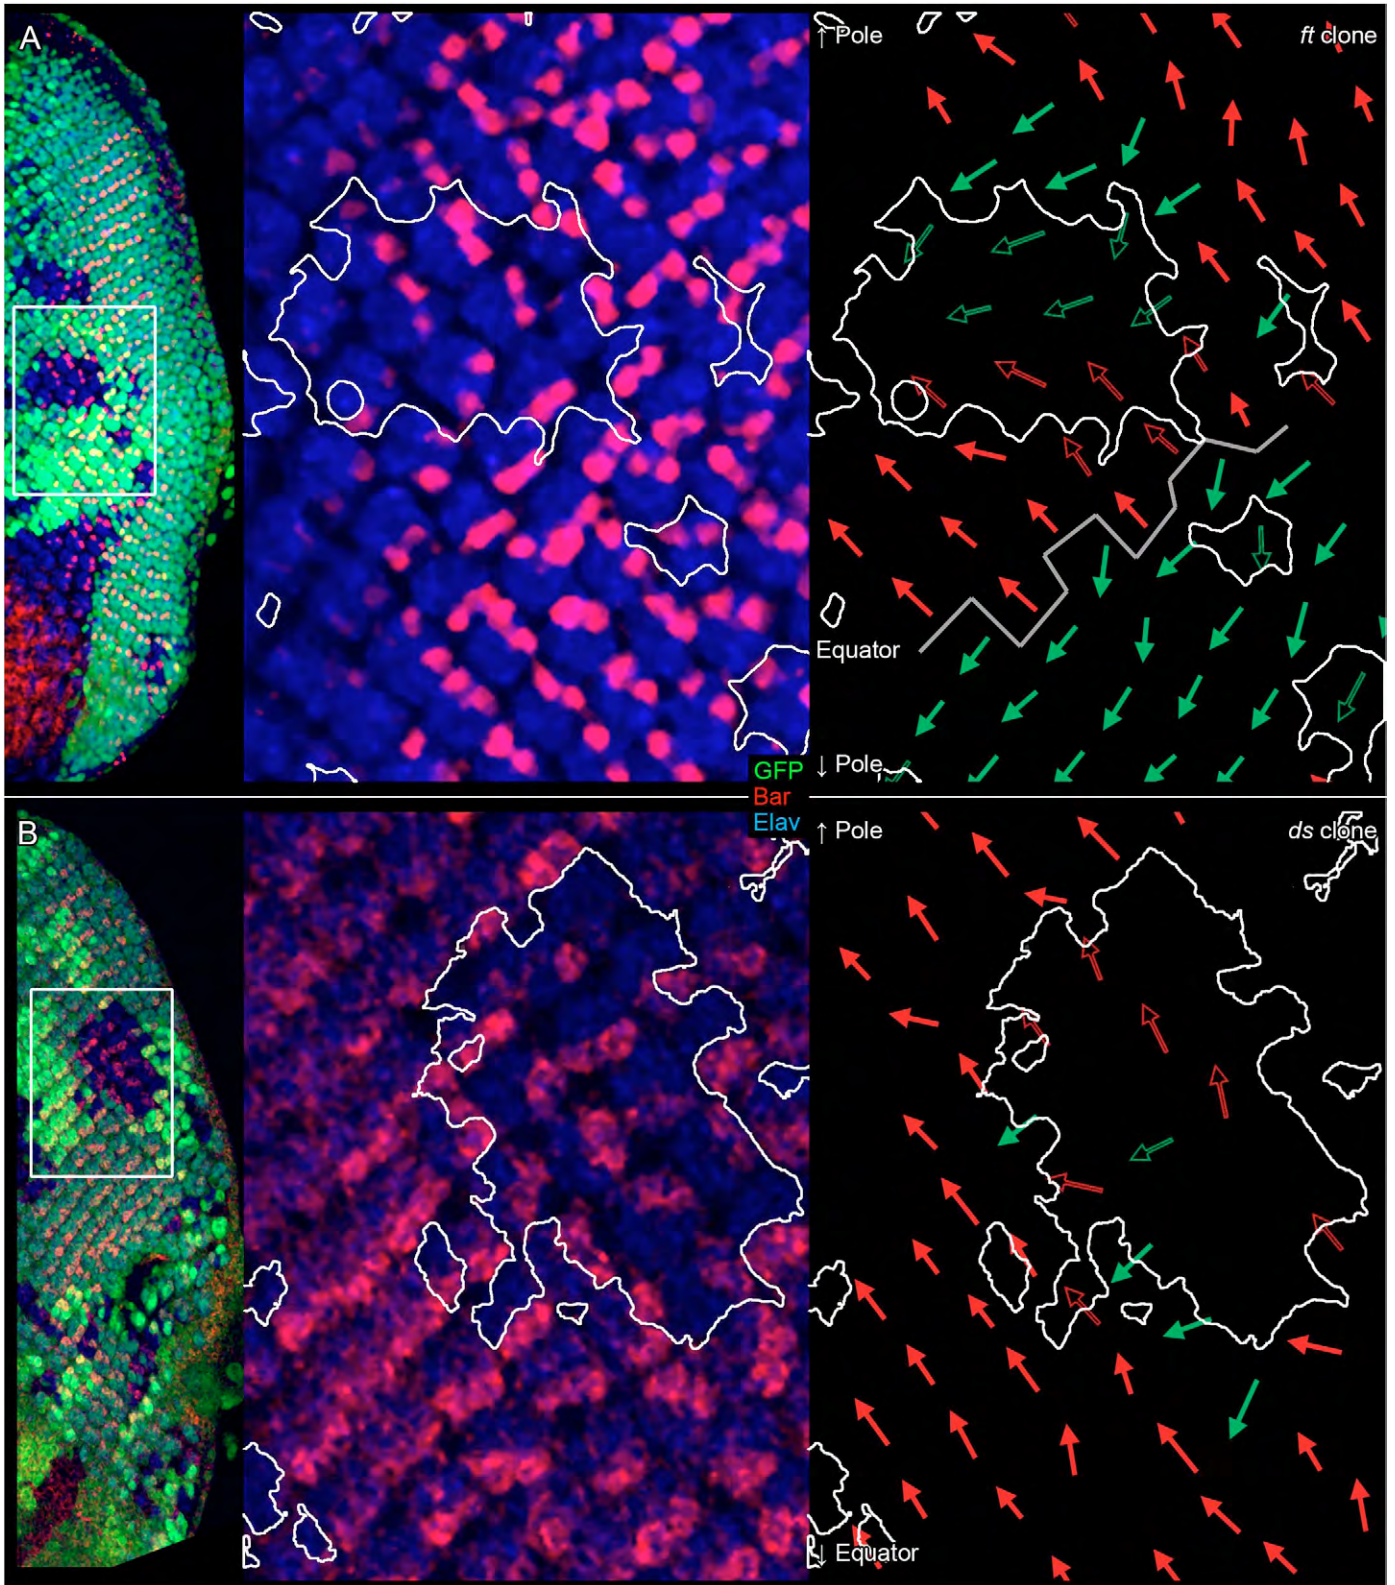

**Fig. S5. Polarity disruptions are evident during development in the eye imaginal disc.** Elav staining marks all photoreceptors, and Bar staining marks photoreceptors 1 and 6. Loss of GFP marks mutant tissue. Mutant tissue is outlined in white in higher magnifications. (A) *ft* clones cause polarity disruptions on the polar side of clones. (B) *ds* clones cause polarity disruptions on the equatorial side of clones.



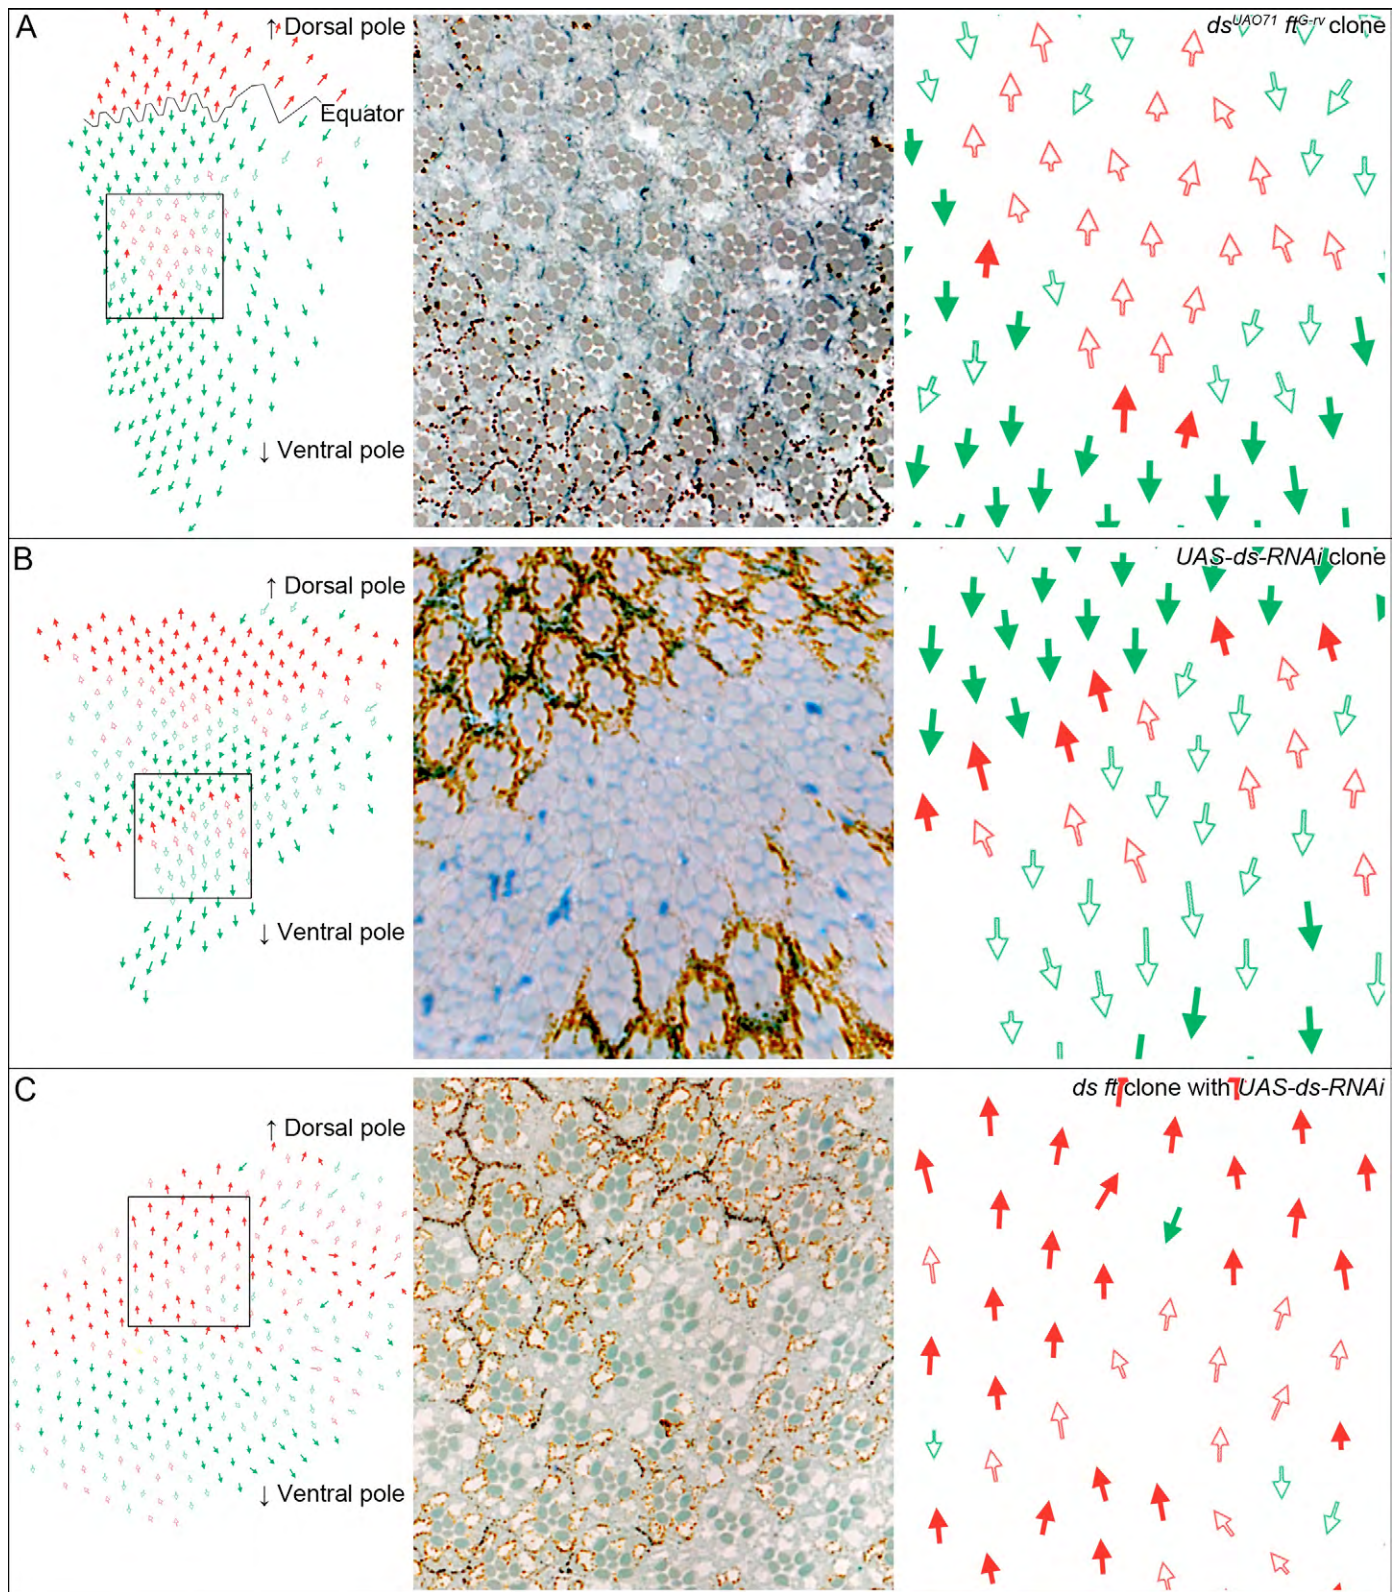

**Fig. S6. Residual *ds* function does not cause *ds ft* clonal polarity effects.** (A)  $ds^{UA071} ft^{G-rv}$  clones, marked by absence of pigment, show polarity reversals outside clones similarly to  $ds^{38k} ft^{G-rv}$  clones. (B) Clones expressing  $UAS-ds-RNAi$ , marked by absence of pigment, show polarity reversals outside equatorial borders of clones, confirming *ds* knockdown. (C)  $ds^{38k} ft^{G-rv}$  clones expressing  $UAS-ds-RNAi$ , marked by absence of pigment, show polarity reversals outside clones similar to *ds ft* clones not expressing RNAi.



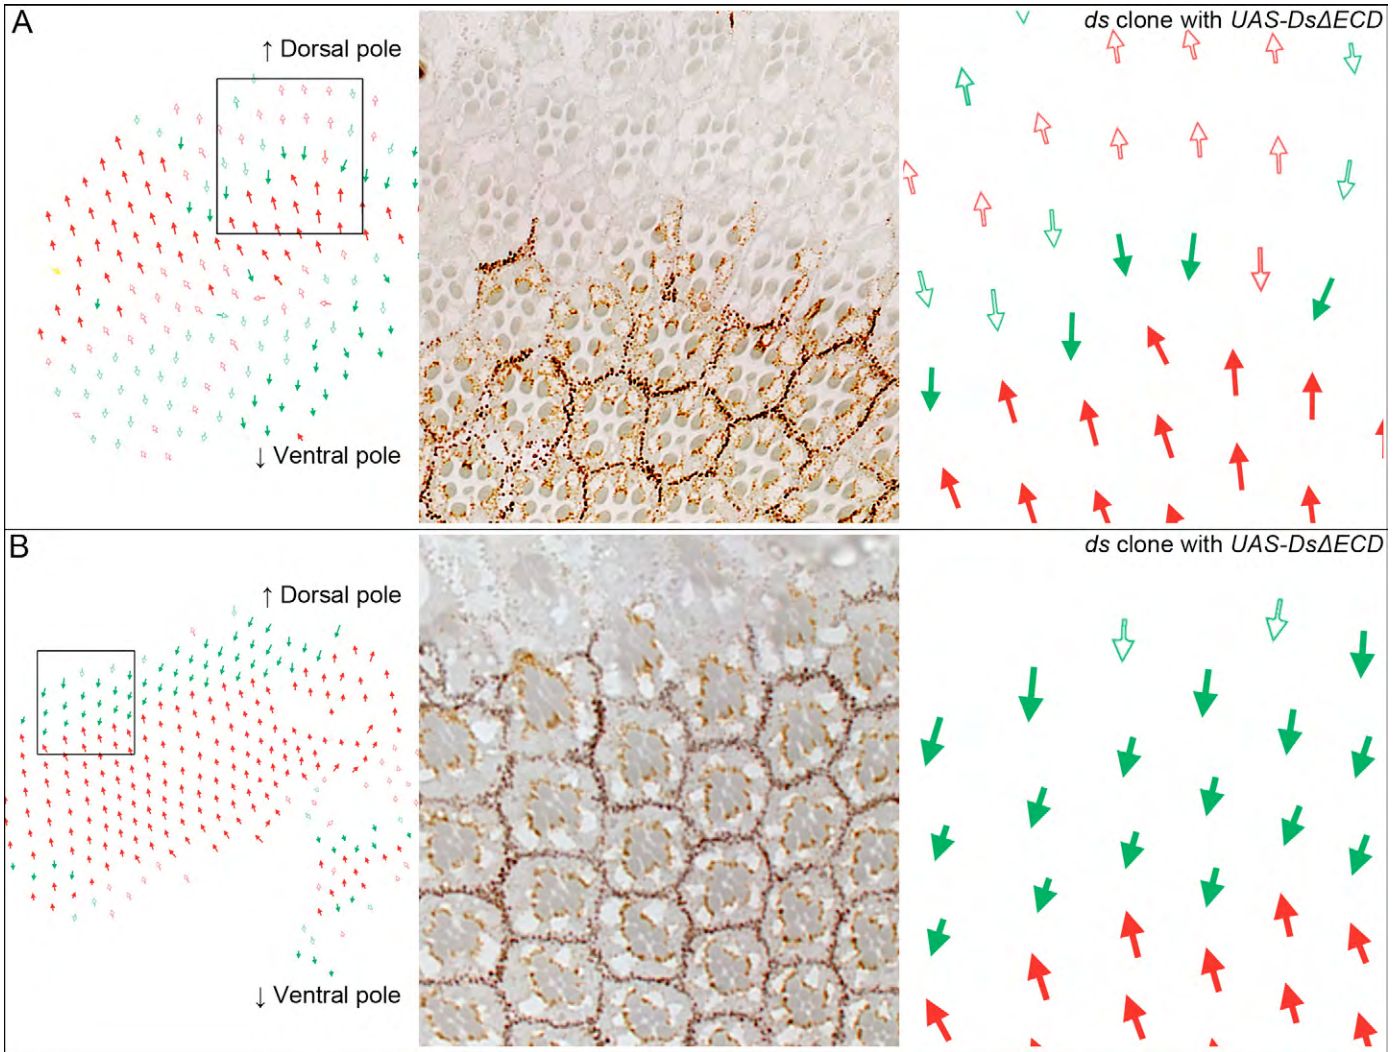

**Fig. S7. Expression of *DsΔECD* strengthens *ds* clonal polarity effects.** (A,B) *ds* mutant clones expressing *UAS-DsΔECD*. There is very strong polarity reversal outside equatorial borders.



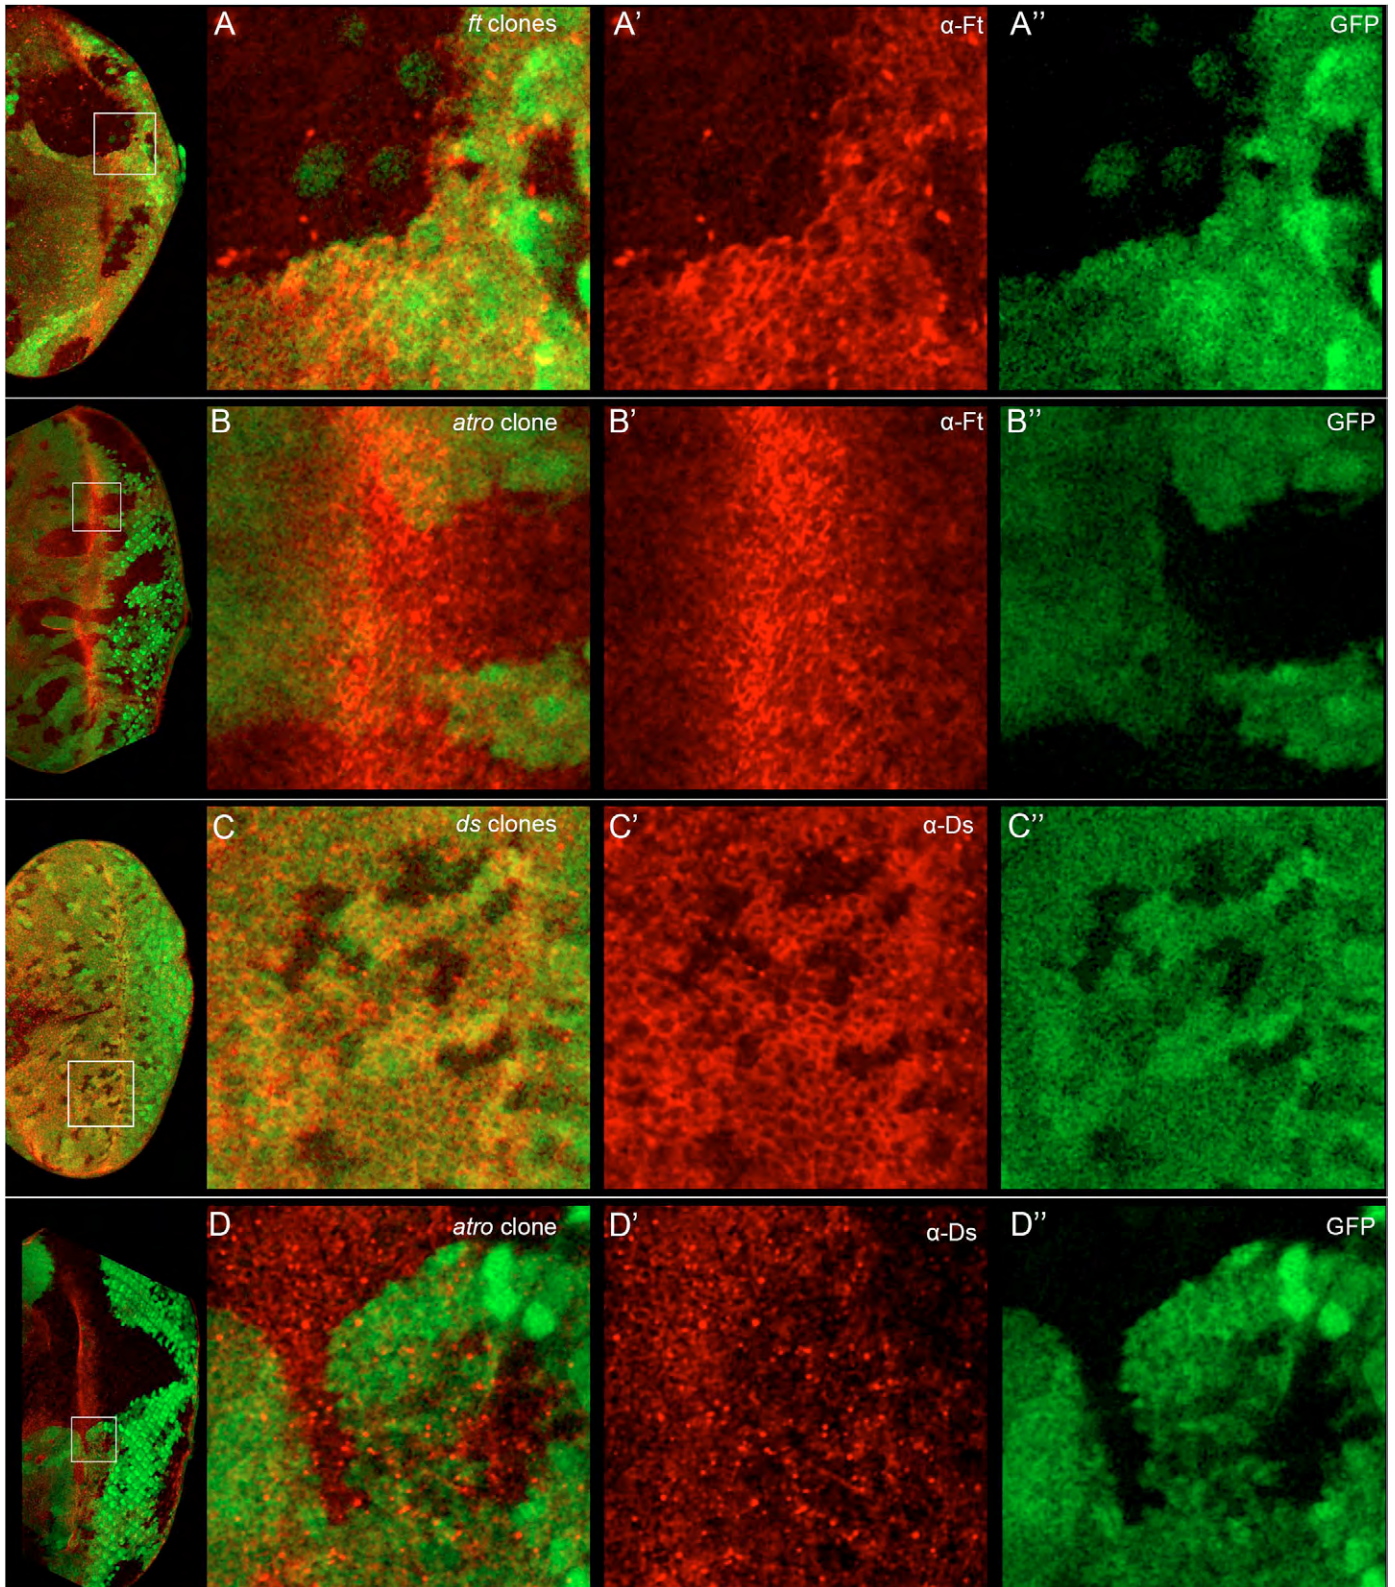

**Fig. S8. Ft and Ds levels and localization are not affected by loss of *atro*.** (A-A'') *ft* mutant clones in eye discs, marked by loss of GFP, show loss of  $\alpha$ -Ft staining. (B-B'') *atro* mutant clones in eye discs, marked by loss of GFP, do not show changes in  $\alpha$ -Ft staining. (C-C'') *ds* mutant clones in eye discs, marked by loss of GFP, show loss of  $\alpha$ -Ds staining. (D-D'') *atro* mutant clones in eye discs, marked by loss of GFP, do not show changes in  $\alpha$ -Ds staining.



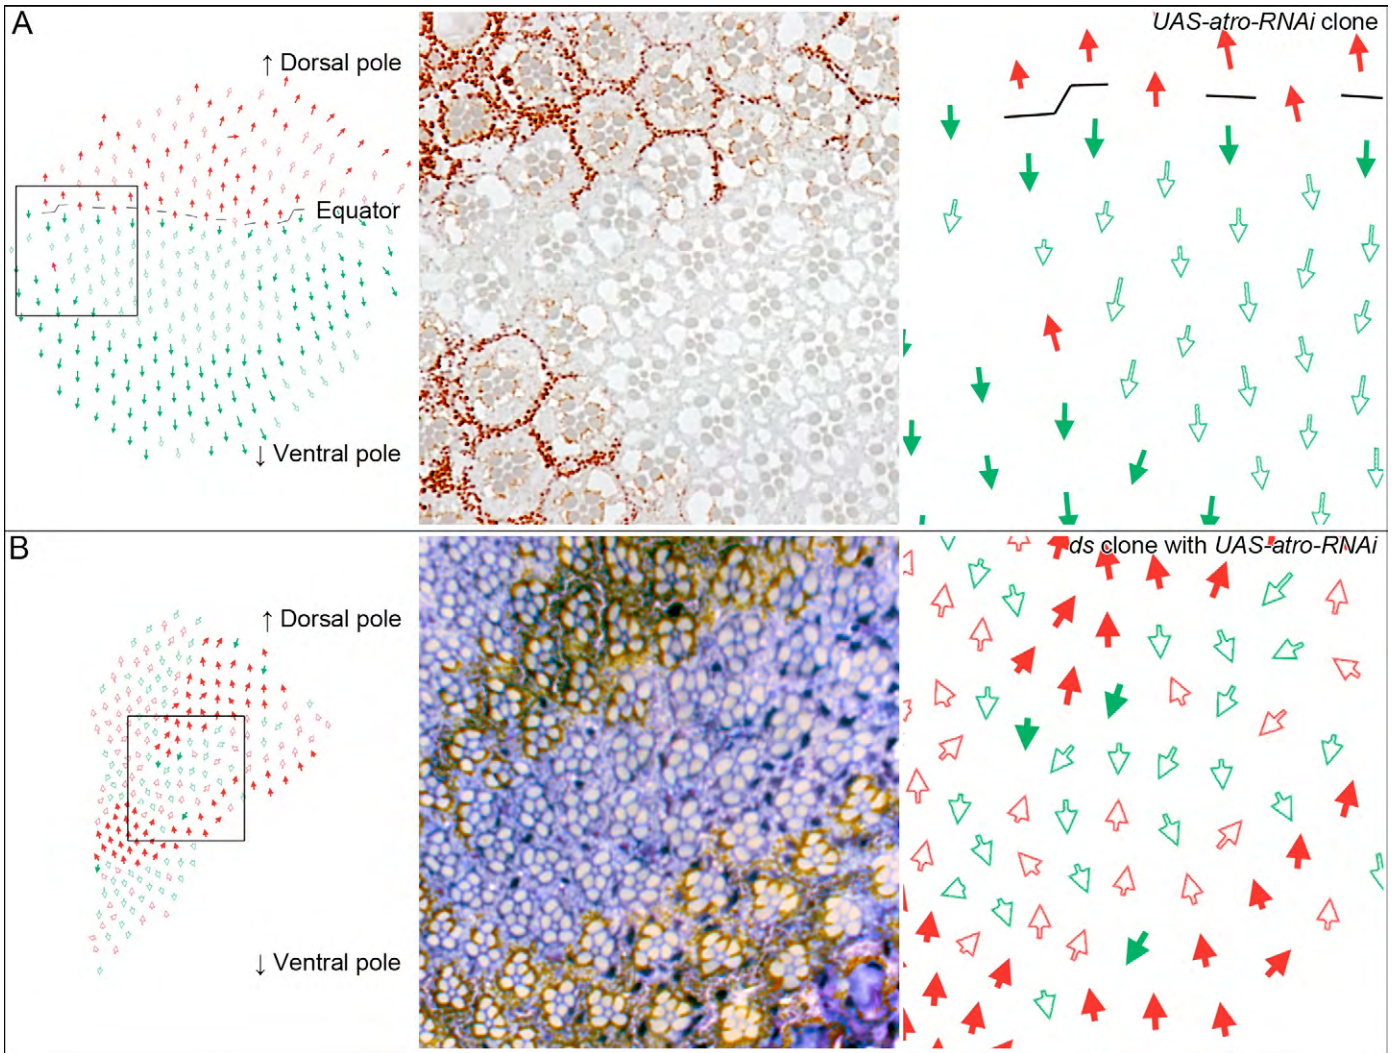

**Fig. S9. *ds* clones expressing *UAS-atro-RNAi* cause polar and equatorial polarity reversals.** (A) Clones expressing *atro-RNAi* occasionally cause polarity reversals in wild-type ommatidia on the polar side. (B) Polarity reversals occur in wild-type ommatidia on the polar and, less frequently, equatorial sides of *ds* clones expressing *atro-RNAi*. No clear rescue or reversal of ommatidial polarity is evident inside the clones.

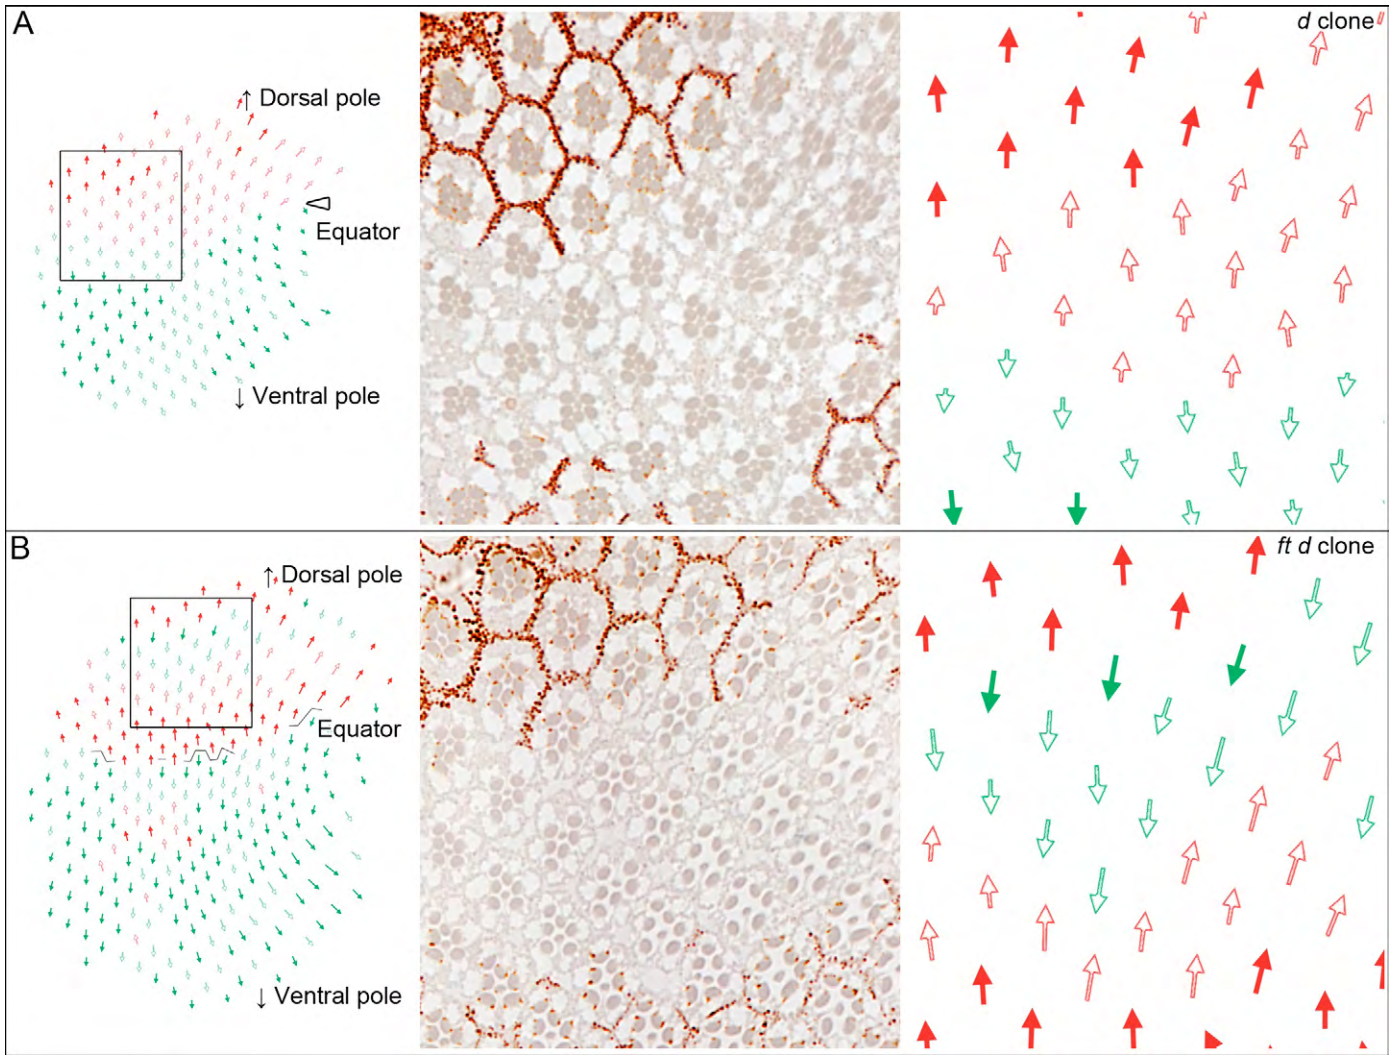

**Fig. S10. *d* does not regulate PCP in the eye.** (A) *d* mutant clones do not disrupt polarity in the eye. As a clone overlaps the equator in this section, the position of the equator is not marked directly on the eye, but is indicated by the arrowhead. (B) *ft d* double mutant clones affect polarity inside and outside clones similarly to *ft* mutant clones.



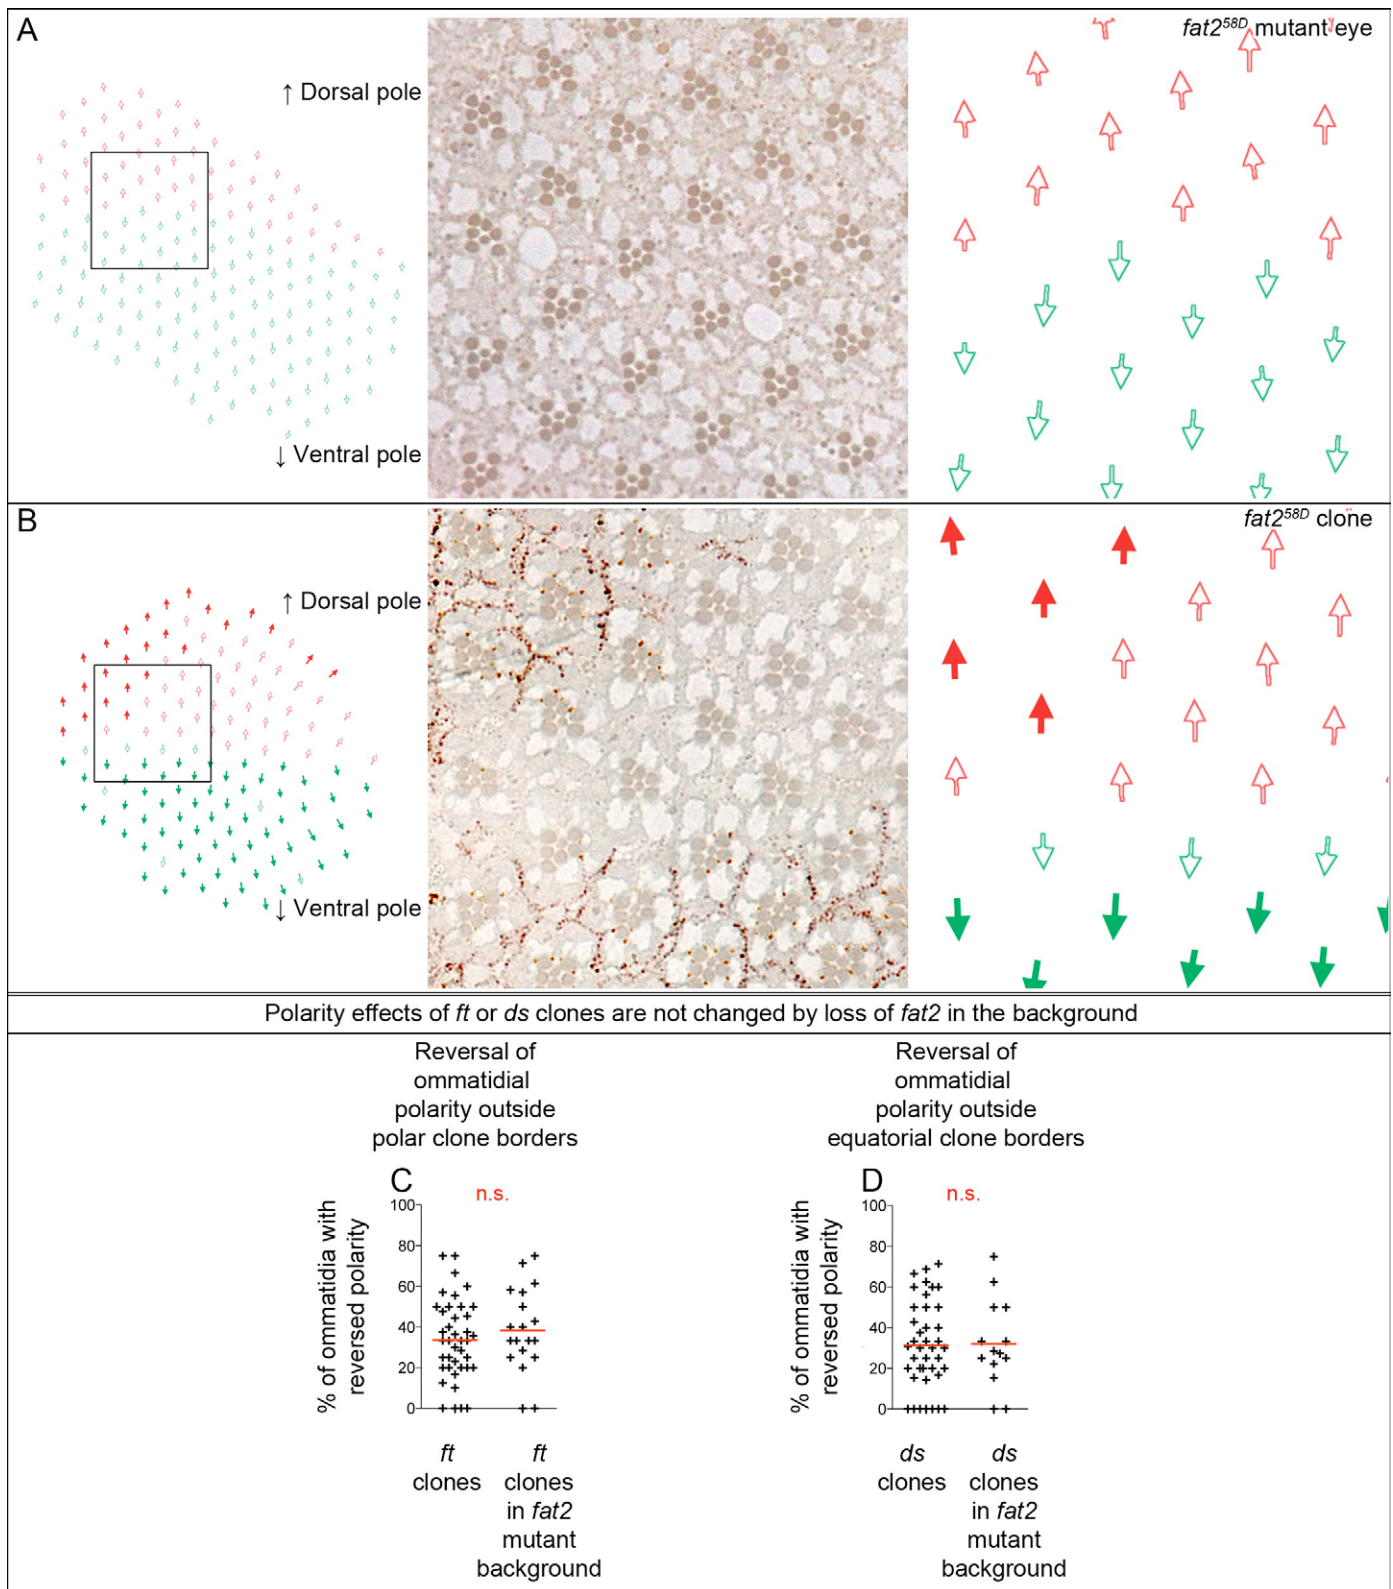

**Fig. S11. *fat2* does not regulate PCP in the eye.** (A) A *fat2* mutant eye. Polarity is normal. (B) A *fat2* mutant clone, marked by absence of pigment. No changes in polarity are observed inside or outside the clone. (C) *ft* mutant clones in a wild-type background do not differ in strength of polarity reversals outside clones from *ft* mutant clones in a *fat2* mutant background. (D) *ds* mutant clones in a wild-type background do not differ in strength of polarity reversals outside clones from *ds* mutant clones in a *fat2* mutant background.



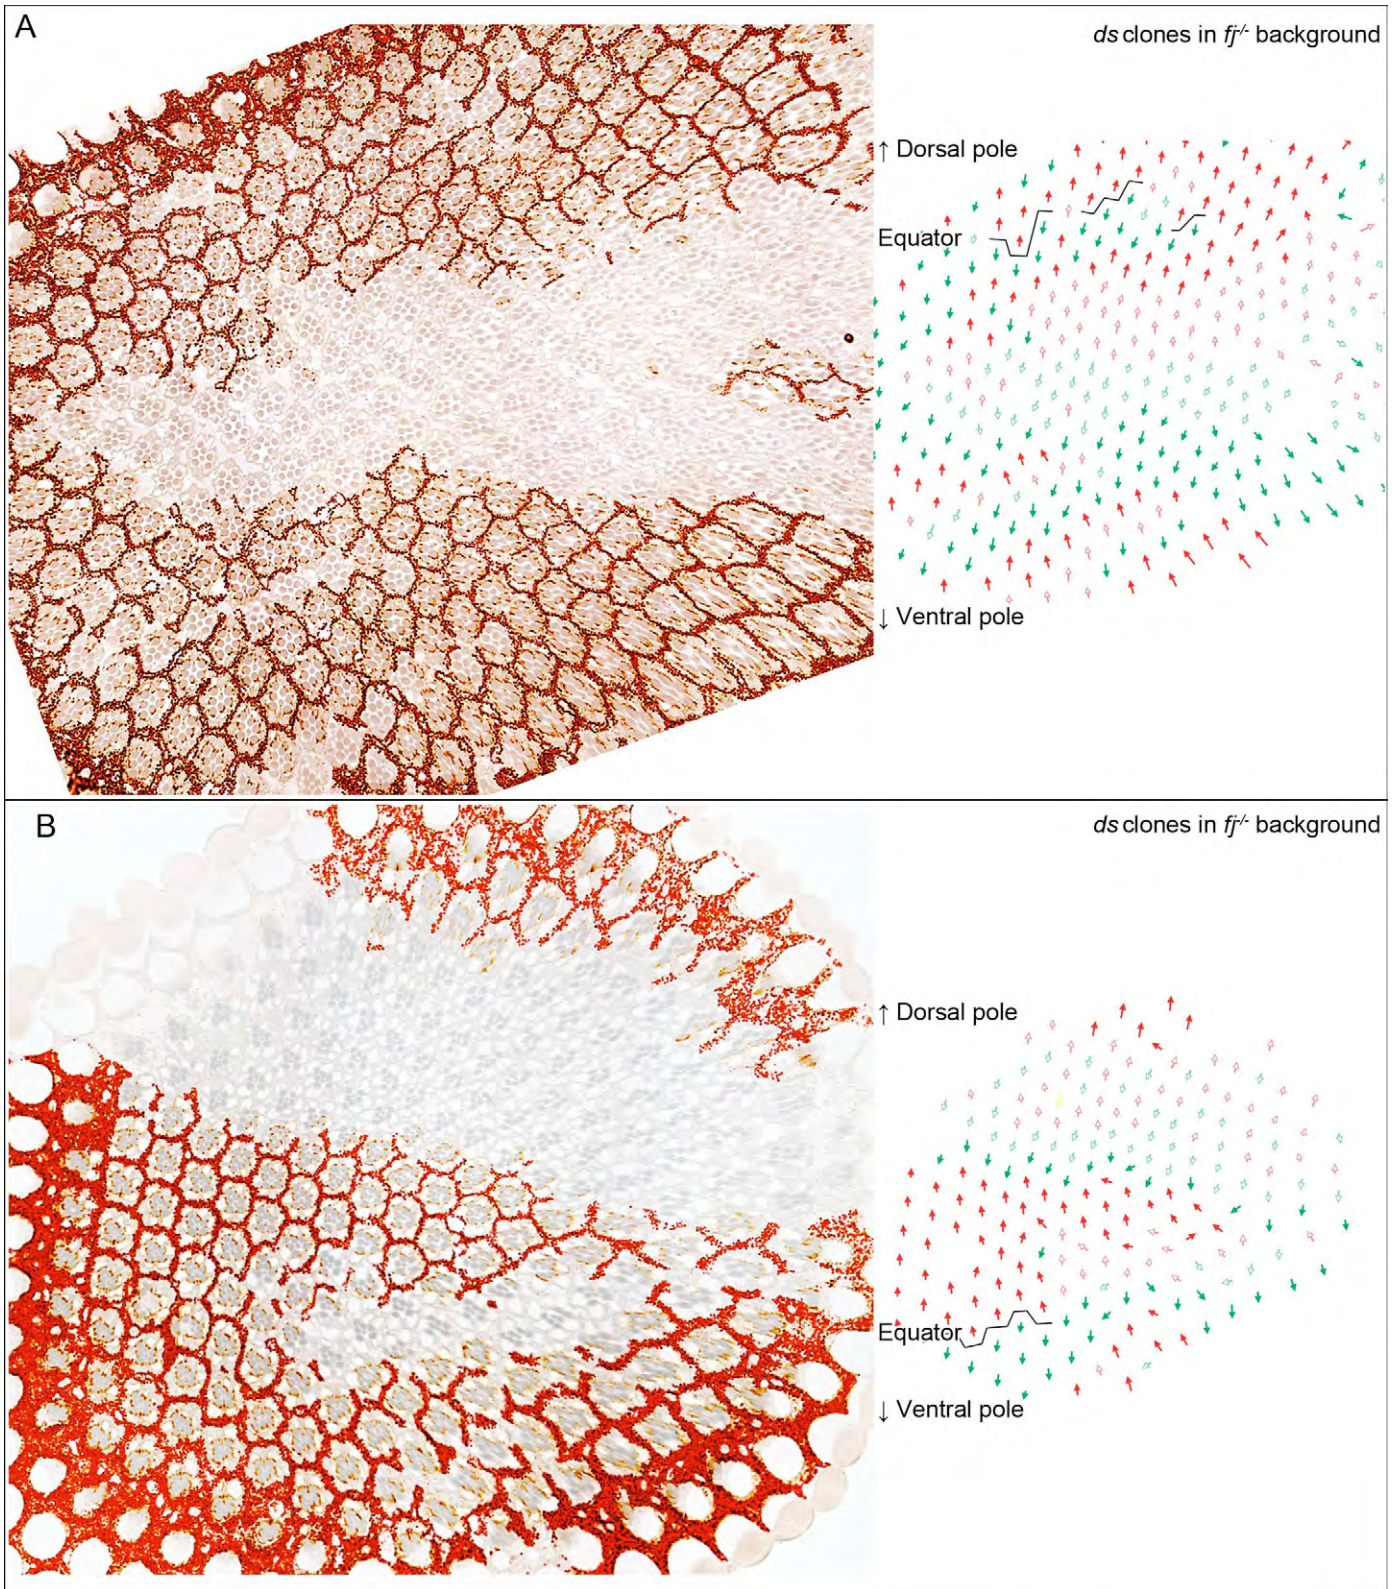

**Fig. S12. Loss of *ff* strengthens *ds* clonal polarity reversals.** *ds*<sup>-</sup> clones generated in a *ff*<sup>-/-</sup> mutant background show extensive reversal of polarity outside clones, and also reversal and rescue of polarity inside clones, which are missing both *ds* and *ff* gradients.



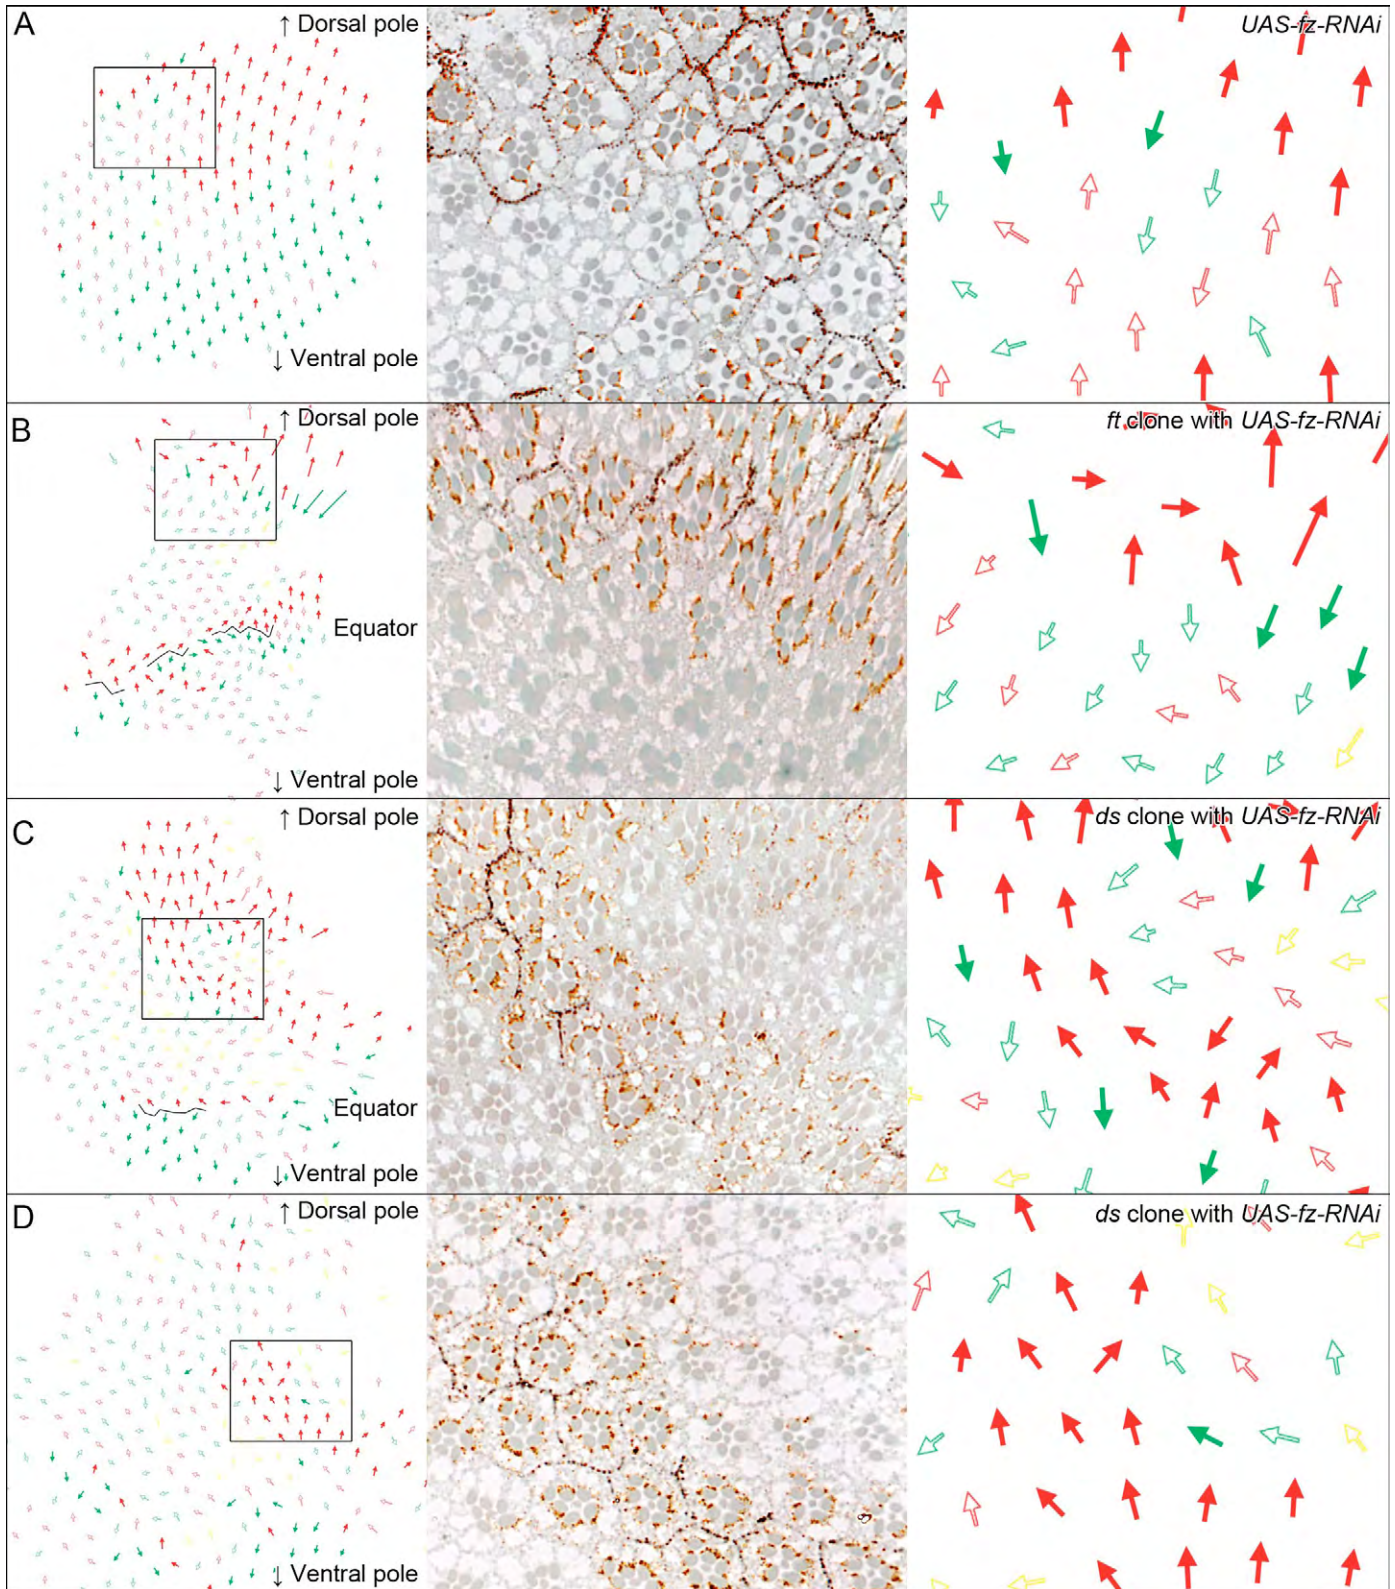

**Fig. S13. *ft* or *ds* clones expressing *UAS-fz-RNAi* cause polar polarity reversals.** (A) Clones expressing *fz-RNAi* cause frequent polarity reversals inside the clone, and occasional reversals in wild-type ommatidia on outside the polar border. (B) *ft* clone expressing *fz-RNAi*. There is frequent polarity reversal outside the polar side, and polarity inside clones is disrupted to a greater degree than with *ft* clones, with many more misrotated and symmetrical ommatidia. (C,D) *ds* clones expressing *fz-RNAi*. There is frequent polarity reversal outside the polar side but only rarely outside the equatorial side of these clones. Furthermore, reversals outside the equatorial side are often associated with misrotation. Polarity inside clones is disrupted to a greater degree than with *ds* clones, with many more misrotated and symmetrical ommatidia.

**Table S1. Quantification and comparison of Ft-Ds polarity effects**

| #  | Figure | Clone                                                       | Polarity effect               | Number of clones | Number of ommatidia | Statistical significance                       |
|----|--------|-------------------------------------------------------------|-------------------------------|------------------|---------------------|------------------------------------------------|
| 1  | 2C, 7A | <i>ft</i> <sup>-</sup>                                      | 33.58% polar reversal         | 40               | 331                 |                                                |
| 2  | 2G     | <i>ft</i> <sup>-</sup> interior – polar side                | 88.79% reversal               | 36               | 153                 | Different to random polarity, <i>P</i> <0.0001 |
| 3  | 2H     | <i>ft</i> <sup>-</sup> interior – equatorial side           | 92.96% rescue                 | 32               | 128                 | Different to random polarity, <i>P</i> <0.0001 |
| 4  | 2D     | <i>ft</i> <sup>-</sup> – DV size effect                     | Correlation: <i>r</i> =0.0028 | 36               | 274                 | No, <i>P</i> =0.9872                           |
| 5  | 2E     | <i>ft</i> <sup>-</sup> – DV position effect                 | Correlation: <i>r</i> =-0.083 | 37               | 282                 | No, <i>P</i> =0.6266                           |
| 6  | 2F     | <i>ft</i> <sup>-</sup> – parallel border                    | 43.96% polar reversal         | 36               | 215                 |                                                |
| 7  | 2F     | <i>ft</i> <sup>-</sup> – slanted border                     | 13.27% polar reversal         | 28               | 107                 | Different to #6, <i>P</i> <0.0001              |
| 8  | 7C     | FtΔECD expression                                           | 1.563% polar reversal         | 16               | 81                  |                                                |
| 9  | 7D     | <i>ft</i> <sup>-</sup> with FtΔECD expression               | 26.39% polar reversal         | 13               | 71                  | Not different to #1, <i>P</i> =0.3086          |
| 10 | 7B     | <i>ft</i> <sup>-</sup> in <i>ff</i> <sup>-</sup> background | 62.59% polar reversal         | 9                | 65                  | Different to #1, <i>P</i> =0.0003              |
| 11 | 7E     | <i>Fz</i> -RNAi expression                                  | 3.667% polar reversal         | 10               | 58                  |                                                |
| 12 | 7F     | <i>ft</i> <sup>-</sup> with <i>fz</i> -RNAi expression      | 40.24% polar reversal         | 7                | 45                  | Not different to #1, <i>P</i> =0.4428          |
| 13 |        | <i>d</i> <sup>-</sup>                                       | 1.818% polar reversal         | 11               | 45                  |                                                |
| 14 | 7G     | <i>ft</i> <sup>-</sup> <i>d</i> <sup>-</sup>                | 31.53% polar reversal         | 19               | 127                 | Not different to #1, <i>P</i> =0.7153          |
| 15 | 3B, 7H | <i>ds</i> <sup>-</sup>                                      | 31.45% equatorial reversal    | 40               | 355                 |                                                |
| 16 | 3F     | <i>ds</i> <sup>-</sup> interior – polar side                | 95.37% rescue                 | 36               | 153                 | Different to random polarity, <i>P</i> <0.0001 |



|    |        |                                                                                 |                            |    |     |                                              |
|----|--------|---------------------------------------------------------------------------------|----------------------------|----|-----|----------------------------------------------|
| 17 | 3G     | <i>ds<sup>-</sup></i> interior – equatorial side                                | 65.86% reversal            | 29 | 179 | Different to random polarity, $P=0.0046$     |
| 18 | 3C     | <i>ds<sup>-</sup></i> – DV size effect                                          | Correlation: $r=0.34$      | 27 | 221 | No, $P=0.0872$                               |
| 19 | 3D     | <i>ds<sup>-</sup></i> – DV position effect                                      | Correlation: $r=0.46$      | 33 | 293 | Yes, $P=0.0073$                              |
| 20 | 3E     | <i>ds<sup>-</sup></i> – parallel border                                         | 30.64% equatorial reversal | 37 | 284 |                                              |
| 21 | 3E     | <i>ds<sup>-</sup></i> – slanted border                                          | 41.55% equatorial reversal | 13 | 71  | Not different to #20, $P=0.2278$             |
| 22 | 7J     | DsΔECD expression                                                               | 4.359% equatorial reversal | 26 | 169 |                                              |
| 23 | 7K     | <i>ds<sup>-</sup></i> with DsΔECD expression                                    | 47.60% equatorial reversal | 18 | 120 | Different to #15, $P=0.0230$                 |
| 24 | 7L     | <i>ft<sup>-</sup></i> with DsΔECD expression – polar border                     | 40.73% polar reversal      | 7  | 71  | Not different to #1, $P=0.2757$              |
| 25 | 7L     | <i>ft<sup>-</sup></i> with DsΔECD expression – equatorial border                | 0% equatorial reversal     | 11 | 92  | N/A                                          |
| 26 | 7M     | <i>ds<sup>-</sup> ft<sup>-</sup></i> with DsΔECD expression – polar border      | 6.250% polar reversal      | 8  | 42  | Not different to #31, $P=0.3543$             |
| 27 | 7M     | <i>ds<sup>-</sup> ft<sup>-</sup></i> with DsΔECD expression – equatorial border | 0% equatorial reversal     | 11 | 72  | N/A                                          |
| 28 | 7I     | <i>ds<sup>-</sup></i> in <i>ff<sup>-</sup></i> background                       | 68.07% equatorial reversal | 23 | 112 | Different to #15, $P<0.0001$                 |
| 29 | 7N     | <i>ds<sup>-</sup></i> with <i>fz</i> -RNAi expression – polar border            | 36.41% polar reversal      | 14 | 84  |                                              |
| 30 | 7N     | <i>ds<sup>-</sup></i> with <i>fz</i> -RNAi expression – equatorial border       | 4.177% equatorial reversal | 15 | 114 | Different to #15, $P<0.0001$                 |
| 31 | 4B, 7O | <i>ds<sup>-</sup> ft<sup>-</sup></i>                                            | 2.987% polar reversals     | 40 | 288 | Different to #1, $P<0.0001$                  |
| 32 | 4F     | <i>ds<sup>-</sup> ft<sup>-</sup></i> interior – polar side                      | 38.42% rescue              | 27 | 112 | Not different to random polarity, $P=0.0844$ |
| 33 | 4G     | <i>ds<sup>-</sup> ft<sup>-</sup></i> interior – equatorial side                 | 72.70% rescue              | 30 | 195 | Different to random polarity, $P<0.0001$     |
| 34 | 4C     | <i>ds<sup>-</sup> ft<sup>-</sup></i> – DV size effect                           | Correlation: $r=0.11$      | 38 | 277 | No, $P=0.5171$                               |

|    |        |                                                                             |                             |    |     |                                  |
|----|--------|-----------------------------------------------------------------------------|-----------------------------|----|-----|----------------------------------|
| 35 | 4D     | <i>ds<sup>-</sup> ft<sup>-</sup></i> – DV position effect                   | Correlation: $r=0.36$       | 36 | 267 | No, $P=0.0335$                   |
| 36 | 4E     | <i>ds<sup>-</sup> ft<sup>-</sup></i> – parallel border                      | 3.356% polar reversals      | 36 | 211 |                                  |
| 37 | 4E     | <i>ds<sup>-</sup> ft<sup>-</sup></i> – slanted border                       | 0.5348% polar reversals     | 17 | 77  | Not different to #36, $P=0.1114$ |
| 38 | 7P     | <i>ds<sup>-</sup> ft<sup>-</sup></i> in <i>ff<sup>-</sup></i> background    | 15.73% polar reversals      | 6  | 43  | Different to #31, $P=0.0004$     |
| 39 | 7Q     | <i>ds</i> -RNAi expression                                                  | 47.61% equatorial reversals | 4  | 40  |                                  |
| 40 | 6C, 7R | <i>Atro<sup>-</sup></i>                                                     | 17.10% polar reversals      | 38 | 362 | Different to #1, $P=0.0003$      |
| 41 | 6D     | <i>atro<sup>-</sup></i> – DV size effect                                    | Correlation: $r=-0.11$      | 38 | 362 | No, $P=0.5265$                   |
| 42 | 6E     | <i>atro<sup>-</sup></i> – DV position effect                                | Correlation: $r=-0.39$      | 35 | 314 | Yes, $P=0.0200$                  |
| 43 | 6F     | <i>atro<sup>-</sup></i> – parallel border                                   | 18.65% polar reversals      | 34 | 302 |                                  |
| 44 | 6F     | <i>atro<sup>-</sup></i> – slanted border                                    | 8.044% polar reversals      | 14 | 66  | Not different to #43, $P=0.0795$ |
| 45 | 7S     | <i>atro<sup>-</sup></i> in <i>ff<sup>-</sup></i> background                 | 54.65% polar reversals      | 13 | 121 | Different to #40, $P<0.0001$     |
| 46 | 7T     | <i>atro</i> -RNAi                                                           | 0.4630% polar reversals     | 9  | 69  |                                  |
| 47 | 7U     | <i>ds<sup>-</sup></i> with <i>atro</i> -RNAi expression – polar border      | 10.15% polar reversals      | 29 | 168 | Different to #46, $P=0.0333$     |
| 48 | 7U     | <i>ds<sup>-</sup></i> with <i>atro</i> -RNAi expression – equatorial border | 3.627% equatorial reversals | 44 | 302 | Different to #15, $P<0.0001$     |
